# Supplementary material for: Fetal growth velocity references from a Chinese population–based fetal growth study
Source: Springer Nature journal article supplement (doi:10.1186/s12884-021-04149-x), 2021-10-09
Supplement: MOESM1 [file 19742984]

# Fetal growth velocity references from a Chinese population–based fetal growth study

## Supplementary materials

### Content

|                                                                                                                     |   |
|---------------------------------------------------------------------------------------------------------------------|---|
| Table S1 List of partner hospitals in this study.....                                                               | 1 |
| Table S2 Demographic characteristics of participants.....                                                           | 2 |
| Figure S1 Numbers of ultrasound measurements at each gestational week .....                                         | 3 |
| Figure S2 Sensitivity analyses of the association between fetal growth velocity and adverse perinatal outcomes..... | 4 |
| Table S3 Equation of linear mixed model with cubic splines and calculation of first derivatives .....               | 5 |

**Table S1** List of partner hospitals in this study

| <b>Provinces</b>                 | <b>Hospitals</b>                                              |
|----------------------------------|---------------------------------------------------------------|
| Beijing                          | Tongzhou Maternal and Child Health Hospital                   |
| Beijing                          | Peking University Third Hospital                              |
| Liaoning                         | Shenyang Maternity and Infant Hospital                        |
| Liaoning                         | Shengjing Hospital Affiliated to China Medical University     |
| Hebei                            | Shijiazhuang Maternal and Child Health Hospital               |
| Hebei                            | Qinhuangdao Maternal and Child Health Hospital                |
| Shanxi                           | Children's Hospital of Shanxi, Women Health Center of Shanxi  |
| Shanxi                           | Changzhi Maternal and Child Health Hospital                   |
| Jilin                            | Changchun Maternity Hospital                                  |
| Gansu                            | Gansu Maternal and Child Health Hospital                      |
| Inner Mongolia Autonomous Region | Inner Mongolia Maternal and Child Health Hospital             |
| Shandong                         | Dongchangfu Maternal and Child Health Hospital                |
| Henan                            | Zhengzhou Central Hospital                                    |
| Xinjiang Uygur Autonomous Region | Urumqi Maternal and Child Health Hospital                     |
| Shaanxi                          | Northwest Women's and Children's Hospital                     |
| Guangdong                        | The Third Affiliated Hospital of Guangzhou Medical University |
| Guangxi Zhuang Autonomous Region | Maternal and Child Health Hospital of Guangxi                 |
| Hunan                            | Hunan Maternal and Child Health Hospital                      |
| Jiangxi                          | Jiangxi Maternal and Child Health Hospital                    |
| Fujian                           | Fujian Maternal and Child Health Hospital                     |
| Fujian                           | The First Affiliated Hospital of Xiamen University            |
| Chongqing                        | Chongqing Maternal and Child Health Hospital                  |
| Chongqing                        | The First Affiliated Hospital of Chongqing Medical University |
| Hubei                            | Hubei Maternal and Child Health Hospital                      |

**Table S2** Demographic characteristics of participants

| <b>Maternal characteristics / Perinatal outcomes</b> | <b>Participants<br/>(n=9,075)</b> |
|------------------------------------------------------|-----------------------------------|
| Maternal age (years), mean $\pm$ SD                  | 29.5 $\pm$ 4.0                    |
| Height (cm) , mean $\pm$ SD                          | 161.2 $\pm$ 4.9                   |
| Pregravid weight (kg) , mean $\pm$ SD                | 55.5 $\pm$ 8.4                    |
| Ethnic group, n(%)                                   |                                   |
| Han                                                  | 8,451(93.1)                       |
| Minority                                             | 624(6.9)                          |
| Education, n(%)                                      |                                   |
| Primary school                                       | 39(0.4)                           |
| Junior high school                                   | 777(8.6)                          |
| Senior high school                                   | 1,455(16.0)                       |
| Bachelor degree                                      | 6,098(67.2)                       |
| Master or above                                      | 706(7.8)                          |
| Parity, n(%)                                         |                                   |
| 0                                                    | 5,663(62.4)                       |
| $\geq$ 1                                             | 3,412(37.6)                       |
| Neonatal gender, n(%)                                |                                   |
| Male                                                 | 4,775(52.6)                       |
| Female                                               | 4,300(47.4)                       |
| Mode of delivery, n(%)                               |                                   |
| Spontaneous                                          | 5,694(62.7)                       |
| Vacuum                                               | 62(0.7)                           |
| Forceps                                              | 124(1.4)                          |
| Cesarean section                                     | 3,195(35.2)                       |
| Premature rupture of membranes, n(%)                 | 1,695(18.7)                       |
| Premature, n(%)                                      | 222(2.5)                          |
| Preterm premature rupture of membranes, n(%)         | 97(1.1)                           |
| Admitted to NICU                                     | 335 (3.7)                         |
| Neonatal complications                               | 453 (4.99)                        |
| Gestational age at delivery, mean $\pm$ SD           | 39.5 $\pm$ 1.2                    |
| Birth weight , mean $\pm$ SD                         | 3,318.0 $\pm$ 407.6               |
| Birth length, mean $\pm$ SD                          | 50.1 $\pm$ 1.8                    |

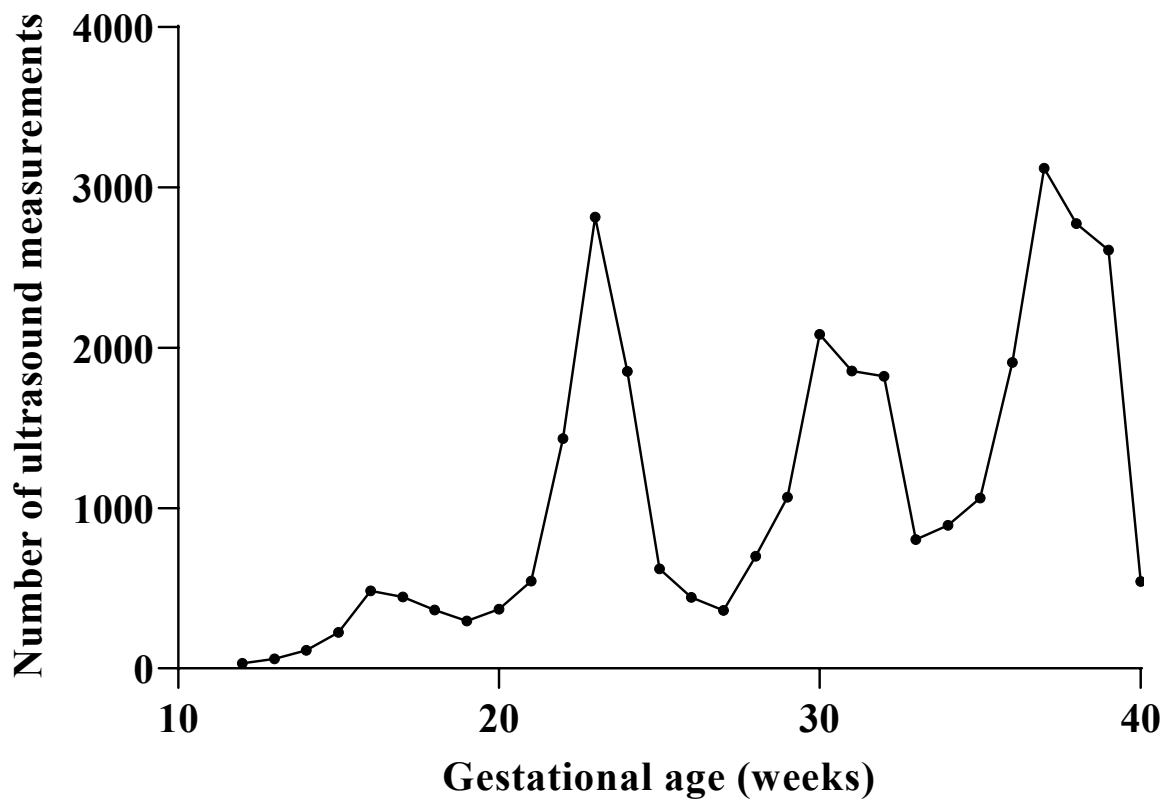

**Figure S1** Numbers of ultrasound measurements at each gestational week

(1) Biparietal diameter velocity less than 10th percentile

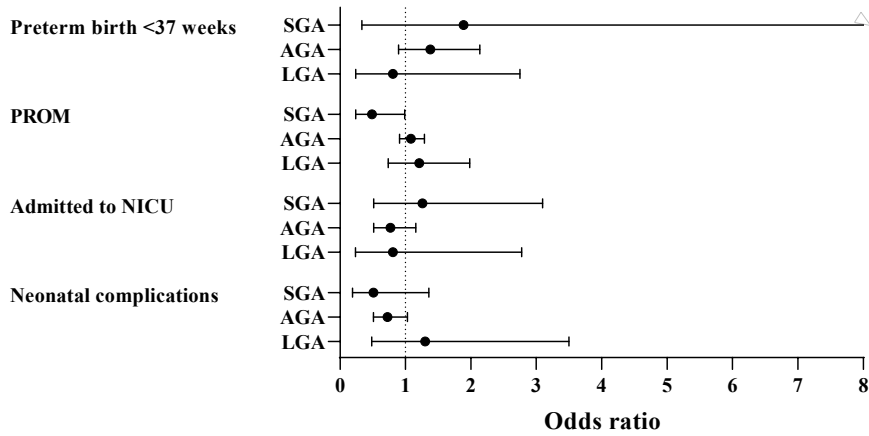

(2) Head circumference velocity less than 10th percentile

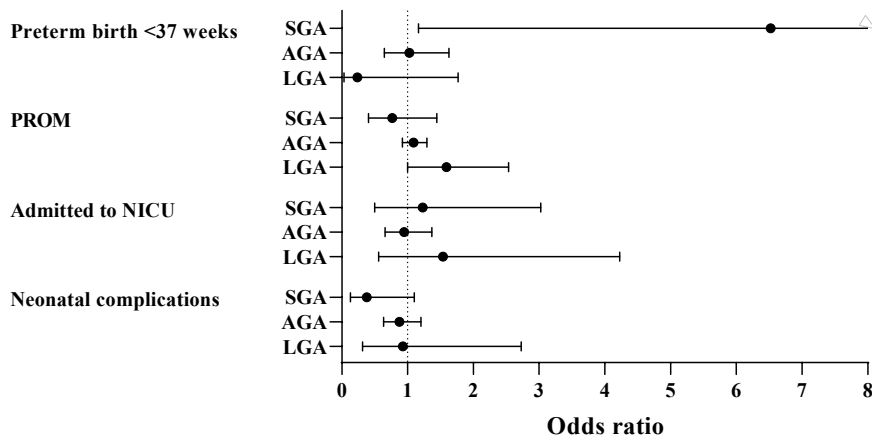

(3) Femur diaphysis length velocity less than 10th percentile

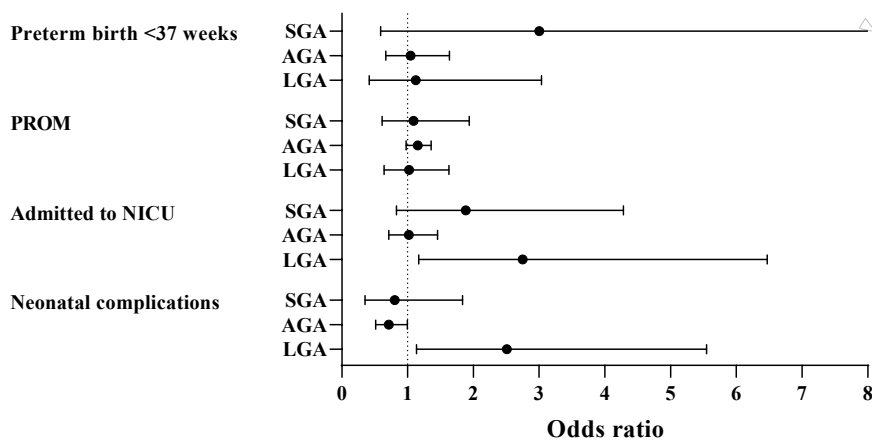

**Figure S2** Sensitivity analyses of the association between fetal growth velocity and adverse perinatal outcomes

PROM, premature rupture of membranes; NICU, neonatal intensive care unit; SGA, small-for-gestational age; AGA, appropriate-for-gestational age; LGA, large-for-gestational age.

**Table S3** Equation of linear mixed model with cubic splines and calculation of first derivatives

|                                                |                                                                                                                                                                                                                                                                                                                                                                                                                                                                                  |
|------------------------------------------------|----------------------------------------------------------------------------------------------------------------------------------------------------------------------------------------------------------------------------------------------------------------------------------------------------------------------------------------------------------------------------------------------------------------------------------------------------------------------------------|
| Regression equation                            | $Y_{ij}^* = \ln(Y_{ij}) = \beta_0 + \beta_1 ges_{ij} + \beta_2 ges_{ij}^2 + \beta_3 ges_{ij}^3 + \beta_4 (ges_{ij} - \xi_1)_+^3$ $+ \beta_5 (ges_{ij} - \xi_2)_+^3 + \beta_6 (ges_{ij} - \xi_3)_+^3 + b_{i0} + b_{i1} ges_{ij} + b_{i2} ges_{ij}^2$ $+ b_{i3} ges_{ij}^3 + \varepsilon_{ij}$ <p>where <math>(ges_{ij} - \xi_k)_+^3 = \begin{cases} 0 &amp; ges \leq \xi \\ (ges_{ij} - \xi_k)^3 &amp; ges &gt; \xi \end{cases}</math></p> $\varepsilon_{ij} \sim N(0, \sigma^2)$ |
| First derivatives equation                     | $Y'_{ij} = \exp(Y_{ij}^*) \left[ \beta_1 + 2\beta_2 ges_{ij} + 3\beta_3 ges_{ij}^2 + 3\beta_4 (ges_{ij} - \xi_1)_+^2 + 3\beta_5 (ges_{ij} - \xi_2)_+^2 \right.$ $\left. + 3\beta_6 (ges_{ij} - \xi_3)_+^2 \right]$                                                                                                                                                                                                                                                               |
| Approximate estimation of the first derivative | $\text{Velocity} = \frac{\Delta Y(ges_{ij})}{\Delta t} = \lim_{h \rightarrow 0} \frac{Y(ges_{ij+h}) - Y(ges_{ij})}{t_{ij+h} - t_{ij}}$                                                                                                                                                                                                                                                                                                                                           |

Regression equation:  $Y_{ij}^*$  donates log-transformed ultrasound biometric parameters or EFW;  $Y_{ij}$  donates original scale ultrasound biometric parameters or EFW;  $ges_{ij}$  donates the  $j$ th gestational weeks for  $i$ th pregnant women;  $(ges_{ij} - \xi_k)_+^3$  donates the three knot sequence at the 25<sup>th</sup>, 50<sup>th</sup>, and 75<sup>th</sup> percentiles of gestational weeks;  $\beta_0 + \beta_1 ges_{ij} + \beta_2 ges_{ij}^2 + \beta_3 ges_{ij}^3 + \beta_4 (ges_{ij} - \xi_1)_+^3 + \beta_5 (ges_{ij} - \xi_2)_+^3 + \beta_6 (ges_{ij} - \xi_3)_+^3$  donates a truncated polynomial splines;  $b_{i0} + b_{i1} ges_{ij} + b_{i2} ges_{ij}^2 + b_{i3} ges_{ij}^3$  donates random intercept and random slope. When calculating the average velocity in population, we assume that the average departure of the individual fetal growth velocity relative to the fetal growth velocity in population is zero. Therefore, we only need the derivative of the fixed effects in the regression equation to obtain the velocity equation.

First derivatives equation:  $Y'_{ij}$  donates the first derivative of original scale of the velocity of ultrasound biometric parameters or EFW.

Approximate estimation of the first derivative: According to the rigorous definition of the derivative, a value of  $h$  close to zero gives a good approximation to the slope of the tangent line, and smaller values (in absolute value) of  $h$  will, in general, give better approximations. We chose 0.01 as the value of  $h$  in the present study to obtain an approximate estimate of fetal growth velocity. This formula actually calculated the average velocity in an interval of 0.01 weeks, considering that the interval is very small, so we use the average velocity as an approximate estimate of the instantaneous velocity. We found pervious literature reported that both size curves (Am J Obstet Gynecol, 2015,213 (4):449.e441-449.e441.) and velocity curves (Am J Obstet Gynecol, 2021,224 (2):208.e201-208.e218.)

were conditional normal distributions. Therefore, we deduced that the percentile of velocity curves corresponded to the percentile of size curves and then calculated the approximate derivatives (fetal growth increment in 0.01 weeks) of the 3rd, 5th, 10th, 25th, 50th, 75th, 90th, 95th, and 97th percentile of the fetal size curves to obtain the corresponding percentile of fetal growth velocity curves.
